# Supplementary material for: Spatial and temporal variation at major histocompatibility complex class IIB genes in the endangered Blakiston’s fish owl
Source: PubMed Central journal article supplement (PMC4657285; doi:10.1186/s40851-015-0013-4), 2015-03-25
Supplement: 40851_2015_13_MOESM1_ESM.pdf [file 40851_2015_13_MOESM1_ESM.pdf]

## Additional file1

**Table S1** MHC class IIB alleles detected in the fish owl samples used in the expression analysis.

Alleles observed in both genomic DNA and cDNA are shown in red; those found only in genomic DNA are shown in black.

| Sample ID | Year | Region | Observed alleles                                                                               | Number of alleles |     |
|-----------|------|--------|------------------------------------------------------------------------------------------------|-------------------|-----|
|           |      |        |                                                                                                | Expressed         | All |
| ID010     | 1985 | KS     | <b>01, 02</b> , 03, 04, <b>05</b> , 06, 07, 08, 09, <b>10, 11</b> , 12                         | 5                 | 12  |
| ID011     | 1986 | AK     | <b>01</b> , 02, 03, 04, <b>05</b> , 06, 07, 08, 09, <b>11</b> , 12                             | 3                 | 10  |
| ID012     | 1986 | SR     | <b>01, 02, 03</b> , 04, <b>05</b> , 06, 07, 08, 09, <b>10</b> , 12, <b>17</b>                  | 6                 | 13  |
| ID014     | 1987 | DS     | <b>01, 02, 03</b> , 04, <b>05, 07</b> , 09, <b>10</b> , 14                                     | 6                 | 9   |
| ID019     | 1988 | KS     | <b>01, 02</b> , 03, 04, <b>05</b> , 06, 07, 08, 09, <b>10, 13</b>                              | 5                 | 11  |
| ID021     | 1989 | SR     | <b>01, 02, 03</b> , 04, <b>05</b> , 06, 07, 08, 09, <b>10</b> , 12, 14, <b>15, 16, 17</b>      | 6                 | 15  |
| ID025     | 1989 | AK     | <b>01, 02</b> , 03, 04, <b>05</b> , 06, 07, 08, 09, <b>10, 11</b>                              | 5                 | 11  |
| ID028     | 1990 | KS     | <b>01, 02, 03</b> , 04, <b>05</b> , 06, 07, 08, 09, <b>10, 11</b>                              | 6                 | 11  |
| ID034     | 1992 | SR     | <b>01, 02</b> , 03, 04, <b>05</b> , 06, 07, 08, 09, <b>10, 11</b> , 12                         | 5                 | 12  |
| ID038     | 1992 | KS     | <b>01, 02</b> , 03, 04, <b>05</b> , 06, 07, 08, 09, <b>10, 11</b>                              | 5                 | 11  |
| ID043     | 1993 | SR     | <b>01, 02, 03</b> , 04, 06, <b>07</b> , 08, 09, 12, 14, <b>15, 16, 17</b>                      | 6                 | 13  |
| ID046     | 1994 | DS     | <b>01, 02, 03</b> , 04, <b>05</b> , 06, 07, 08, 09, <b>10</b> , 14                             | 5                 | 11  |
| ID047     | 1994 | DS     | <b>01, 02, 03</b> , 04, <b>05</b> , 06, <b>07</b> , 08, 09, <b>10, 11</b> , 12, <b>13</b> , 14 | 8                 | 14  |
| ID058     | 1995 | SR     | <b>01, 02, 03</b> , 04, <b>05</b> , 06, 07, 08, <b>10</b>                                      | 5                 | 9   |
| ID059     | 1996 | SR     | <b>01, 02</b> , 03, 04, <b>05</b> , 06, 07, 08, 09, <b>10, 11</b> , 12                         | 5                 | 12  |
| ID060     | 1996 | DS     | <b>01, 02, 03</b> , 04, <b>05</b> , 06, 07, 08, 09, <b>10, 11</b> , 14                         | 6                 | 12  |

**Table S2** Pairwise  $G_{ST}$  estimates (below diagonal) between the populations in the three periods.  $P$ -values (above diagonal) were obtained by permutation tests (1000 replications). Significant  $G_{ST}$  values ( $P < 0.05$ ) are highlighted.

|                        |    | Period1 (1963–1992) |         |         |         | Period2 (1993–2002) |         |         |         | Period3 (2003–2012) |         |        |        |        |
|------------------------|----|---------------------|---------|---------|---------|---------------------|---------|---------|---------|---------------------|---------|--------|--------|--------|
|                        |    | SR                  | KS      | AK      | DS      | SR                  | KS      | AK      | DS      | SR                  | KS      | AK     | DS     | HD     |
| Period1<br>(1963–1992) | SR |                     | 0.013   | 0.876   | 0.967   | 0.969               | 0.071   | 0.451   | 0.557   | 1.000               | 0.112   | 0.045  | 0.556  | 0.264  |
|                        | KS | 0.0018              |         | 0.995   | 0.411   | 0.043               | 1.000   | 1.000   | 0.287   | 0.049               | 1.000   | 0.969  | 0.024  | 0.004  |
|                        | AK | -0.0009             | -0.0014 |         | 0.789   | 0.902               | 0.910   | 1.000   | 0.776   | 0.913               | 0.913   | 0.922  | 0.724  | 0.207  |
|                        | DS | -0.0016             | 0.0001  | -0.0014 |         | 0.898               | 0.305   | 0.537   | 1.000   | 0.983               | 0.408   | 0.257  | 0.987  | 0.621  |
| Period2<br>(1963–2002) | SR | -0.0006             | 0.0013  | -0.0007 | -0.0011 |                     | 0.007   | 0.442   | 0.487   | 1.000               | 0.019   | 0.004  | 0.889  | 0.218  |
|                        | KS | 0.0022              | -0.0017 | -0.0010 | 0.0003  | 0.0015              |         | 1.000   | 0.112   | 0.005               | 1.000   | 0.696  | 0.008  | 0.001  |
|                        | AK | -0.0001             | -0.0024 | -0.0030 | -0.0005 | -0.0002             | -0.0024 |         | 0.583   | 0.376               | 1.000   | 0.986  | 0.306  | 0.050  |
|                        | DS | -0.0001             | 0.0005  | -0.0007 | -0.0026 | -0.0002             | 0.0006  | -0.0006 |         | 0.481               | 0.140   | 0.016  | 1.000  | 0.061  |
| Period3<br>(2003–2012) | SR | -0.0009             | 0.0017  | -0.0007 | -0.0015 | -0.0005             | 0.0021  | 0.0002  | 0.0000  |                     | 0.004   | 0.001  | 0.563  | 0.155  |
|                        | KS | 0.0021              | -0.0016 | -0.0009 | 0.0000  | 0.0016              | -0.0019 | -0.0022 | 0.0007  | 0.0021              |         | 0.877  | 0.011  | <0.001 |
|                        | AK | 0.0023              | -0.0009 | -0.0011 | 0.0008  | 0.0028              | -0.0005 | -0.0017 | 0.0023  | 0.0027              | -0.0008 |        | <0.001 | <0.001 |
|                        | DS | 0.0000              | 0.0016  | -0.0005 | -0.0017 | -0.0003             | 0.0020  | 0.0002  | -0.0011 | -0.0001             | 0.0022  | 0.0034 |        | 0.116  |
|                        | HD | 0.0012              | 0.0035  | 0.0010  | -0.0005 | 0.0006              | 0.0039  | 0.0023  | 0.0013  | 0.0003              | 0.0040  | 0.0051 | 0.0006 |        |

(A) Genomic DNA

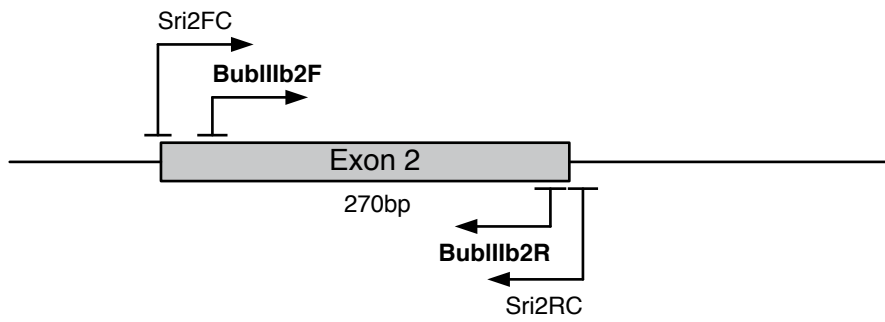

(B) cDNA

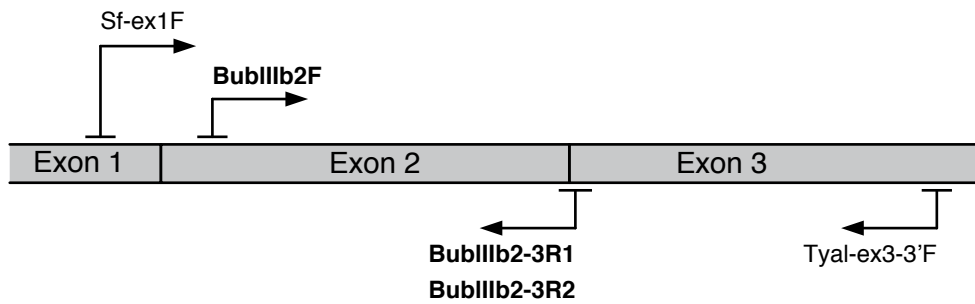

**Figure S1** Location of primers used in the present study. Primer pairs used to amplify the fragments for pyrosequencing are shown in bold.

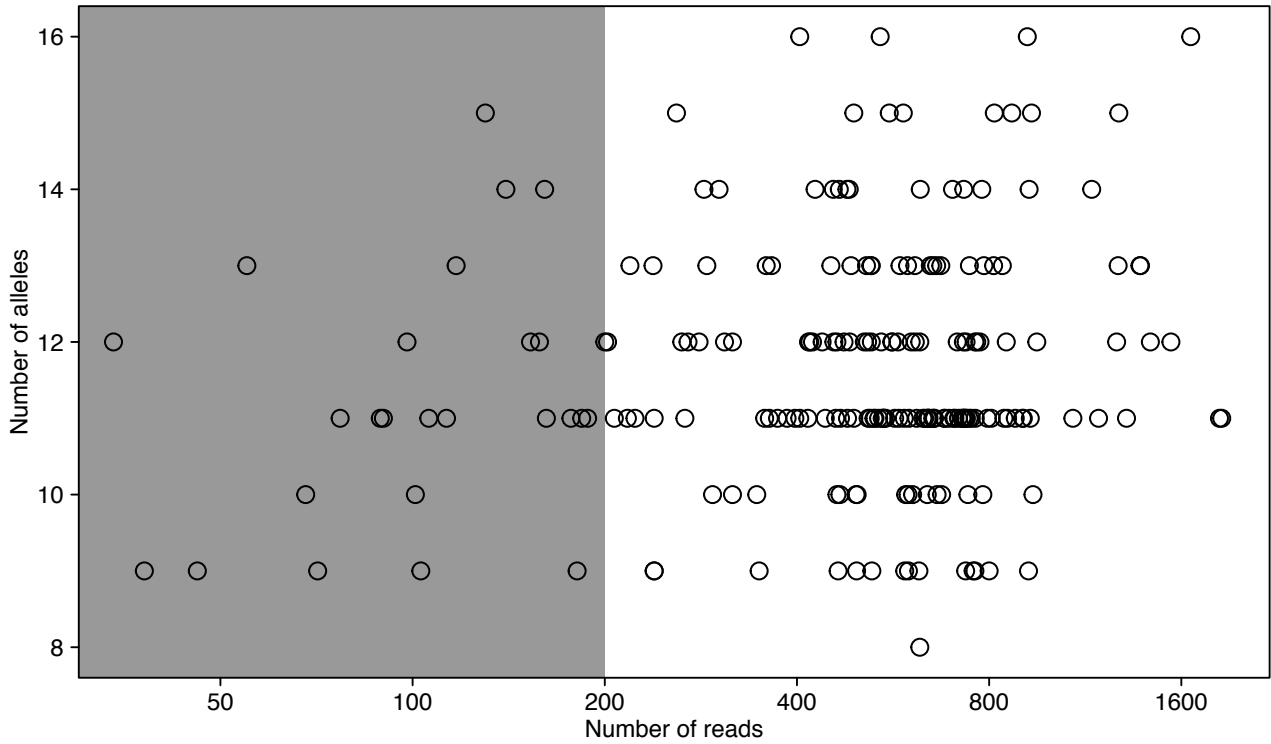



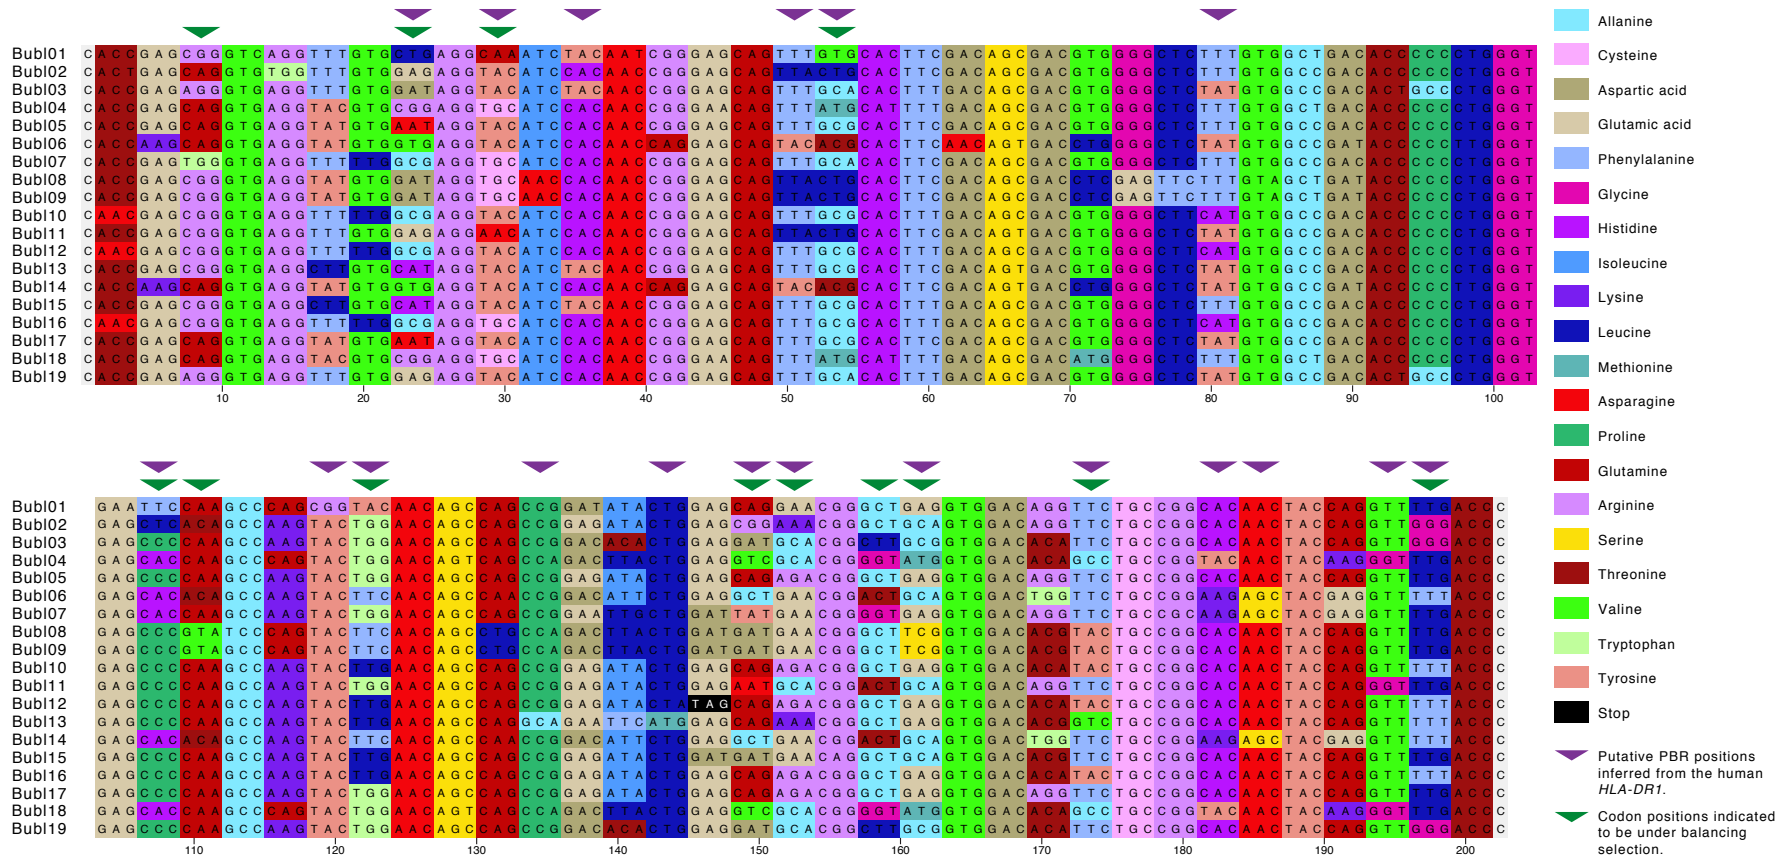

**Figure S4** Alignment of nucleotide sequences of fish owl MHC class II $\beta$  alleles. Codons are colored according to the amino acids they encode. Codon positions for the putative peptide binding region (PBR) inferred from the structure of the human *HLA-DR1* molecule [54] are indicated with purple arrows. Codon positions indicated by the omegaMap analysis to be under balancing selection from are indicated with green arrows. The figure was created with the Chromaseq package version 1.12 in Mesquite 3.01 (Available from <http://mesquiteproject.org/packages/chromaseq/manual/index.html/>).

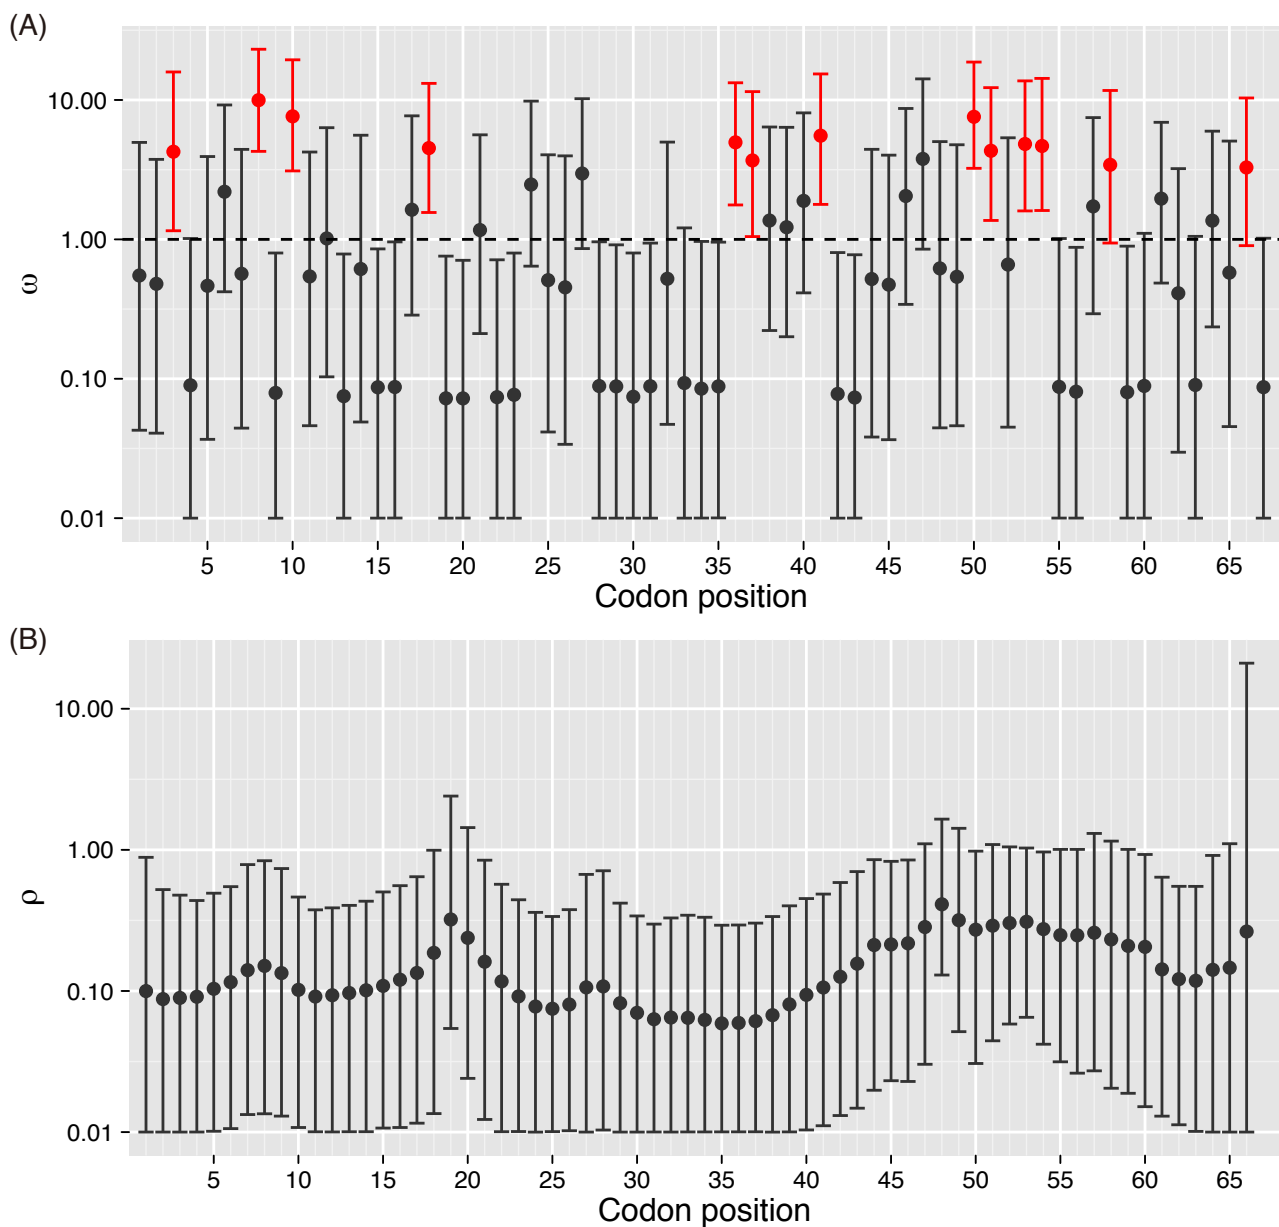

**Figure S5** Variation in the  $d_N/d_S$  ratio ( $= \omega$ ) (A) and recombination rate ( $= \rho$ ) (B) along the MHC class IIB exon 2 of the fish owl, generated with omegaMap. Error bars indicate 95% highest posterior density intervals. Codon positions indicated to be under balancing selection (the posterior probability for  $\omega > 1$  exceeds 0.95) are colored red.
